# Supplementary material for: Amino Acid Absorption Profiles in Growing Pigs Fed Different Protein Sources
Source: MDPI journal article supplement (doi:10.3390/ani11061740), 2021-06-10
Supplement: s1 [file s1]

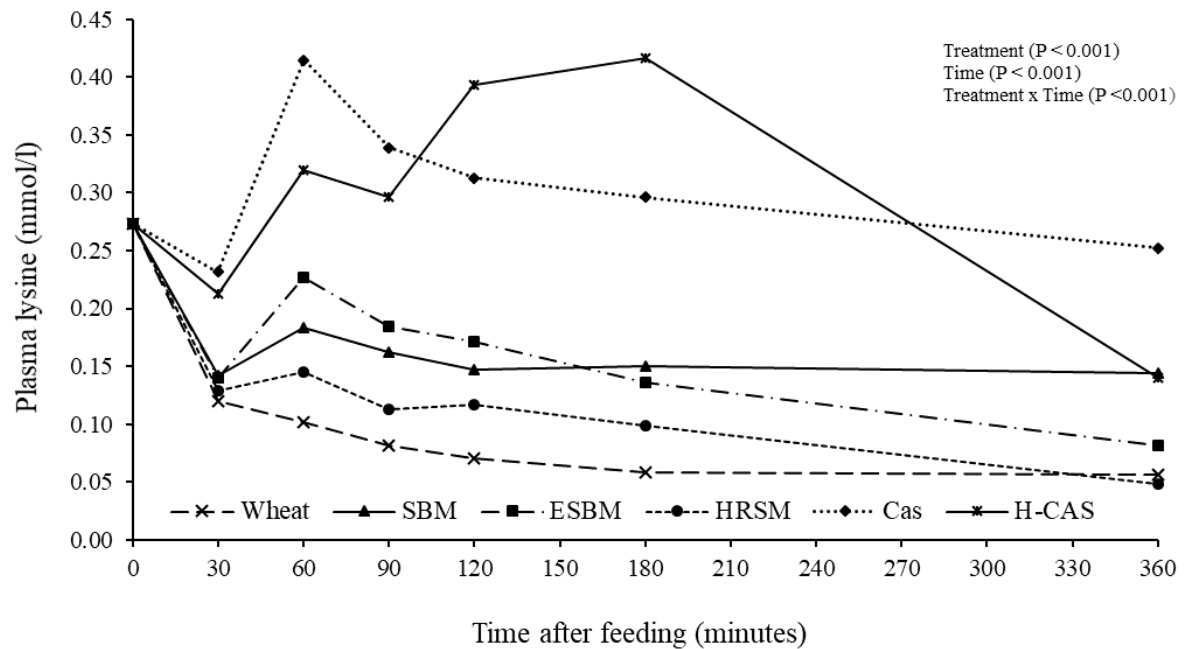

**Figure S1.** Postprandial lysine (Lys) concentration in plasma of growing pigs fed experimental diets containing wheat, soybean meal (SBM), enzyme-treated soybean meal (ESBM), hydrothermally treated rapeseed meal (HRSM), casein (Cas) and hydrolysed casein (H-Cas) as the only dietary protein sources. Values are least squares means with five replicates.

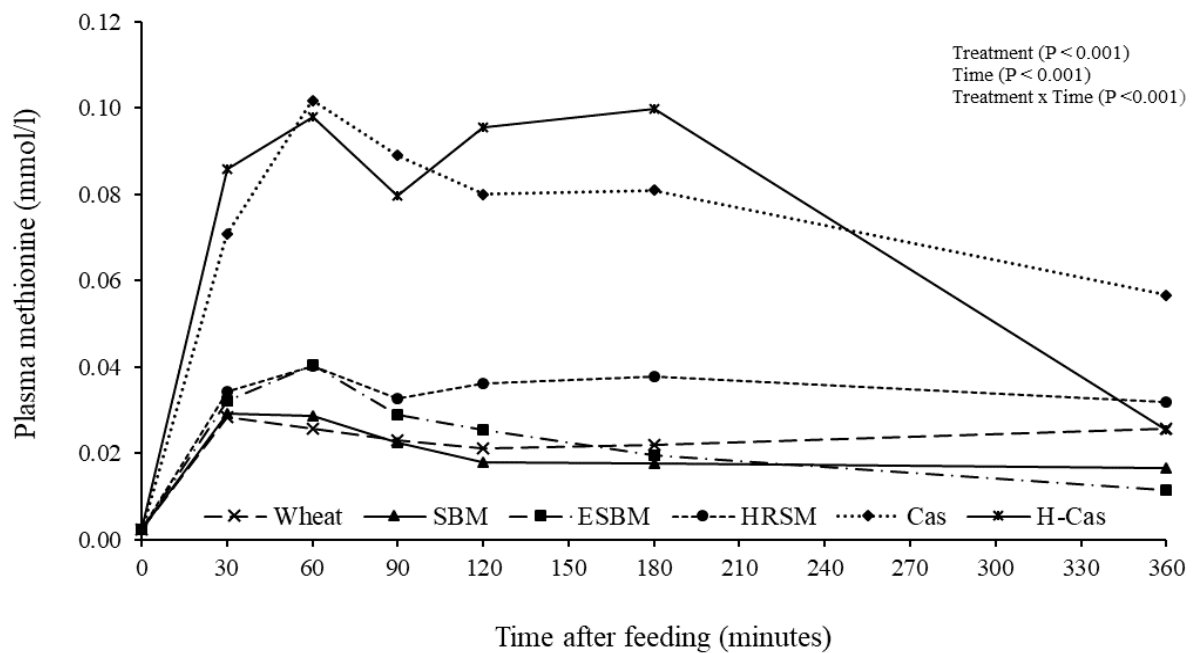

**Figure S2.** Postprandial methionine (Met) concentration in plasma of growing pigs fed experimental diets containing wheat, soybean meal (SBM), enzyme-treated soybean meal (ESBM), hydrothermally treated rapeseed meal (HRSM), casein (Cas) and hydrolysed casein (H-Cas) as the only dietary protein sources. Values are least squares means with five replicates.
